# Supplementary material
Source: PubMed Central journal article supplement (PMC5824213)
Supplement: jamaoncol-3-737-s001.pdf [file jamaoncol-3-737-s001.pdf]

## Supplementary Online Content

Flaig TW, Plets M, Hussain MHA, et al. Abiraterone acetate for metastatic prostate cancer in patients with suboptimal biochemical response to hormone induction. *JAMA Oncol*. Published online March 30, 2017.  
doi:10.1001/jamaoncol.2017.0231

### **eTable.** Adverse Events

This supplementary material has been provided by the authors to give readers additional information about their work.

**eTable. Adverse Events**

| ADVERSE EVENTS                      | Abiraterone Acetate (n=40) |       |    |    |   |   |
|-------------------------------------|----------------------------|-------|----|----|---|---|
|                                     | 0                          | Grade | 2  | 3  | 4 | 5 |
| ALT increased                       | 32                         | 4     | 2  | 1  | 1 | 0 |
| AST increased                       | 31                         | 7     | 0  | 2  | 0 | 0 |
| Anorexia                            | 38                         | 1     | 0  | 1  | 0 | 0 |
| Hyperglycemia                       | 30                         | 8     | 0  | 2  | 0 | 0 |
| Hypertension                        | 30                         | 2     | 6  | 2  | 0 | 0 |
| Hypokalemia                         | 36                         | 2     | 0  | 2  | 0 | 0 |
| INR increased                       | 39                         | 0     | 0  | 1  | 0 | 0 |
| Leukocytosis                        | 39                         | 0     | 0  | 1  | 0 | 0 |
| Lung infection                      | 38                         | 0     | 1  | 1  | 0 | 0 |
| Nausea                              | 35                         | 3     | 0  | 2  | 0 | 0 |
| Rectal hemorrhage                   | 39                         | 0     | 0  | 0  | 1 | 0 |
| Thromboembolic event                | 39                         | 0     | 0  | 1  | 0 | 0 |
| Vomiting                            | 38                         | 0     | 0  | 2  | 0 | 0 |
| Weight gain                         | 37                         | 2     | 0  | 1  | 0 | 0 |
| <b>MAX. GRADE ANY ADVERSE EVENT</b> | 3                          | 11    | 13 | 11 | 2 | 0 |

Abbreviations: ALT, alanine aminotransferase; AST, aspartate aminotransferase; INR, international normalized ratio.
